# Supplementary material
Source: publisher figshare collection journal article supplement (https://karger.figshare.com/ndownloader/files/36005978)
Supplement: Supplementary file 1 [file 36005978]

## Supplementary Materials

According to the growth standards of China “Screening for overweight and obesity among school-age children and adolescents (WS/T 586-2018)”, obesity (overweight) is defined using age- and sex-specific BMI cut-off points.

Table. Cutoffs of overweight, general obesity and possible malnutrition based on body mass index (BMI)

| Age(years) | Male | | Female | |
| --- | --- | --- | --- | --- |
| overweight | obesity | overweight | obesity |
| 6.0～ | 16.4 | 17.7 | 16.2 | 17.5 |
| 6.5～ | 16.7 | 18.1 | 16.5 | 18.0 |
| 7.0～ | 17.0 | 18.7 | 16.8 | 18.5 |
| 7.5～ | 17.4 | 19.2 | 17.2 | 19.0 |
| 8.0～ | 17.8 | 19.7 | 17.6 | 19.4 |
| 8.5～ | 18.1 | 20.3 | 18.1 | 19.9 |
| 9.0～ | 18.5 | 20.8 | 18.5 | 20.4 |
| 9.5～ | 18.9 | 21.4 | 19.0 | 21.0 |
| 10.0～ | 19.2 | 21.9 | 19.5 | 21.5 |
| 10.5～ | 19.6 | 22.5 | 20.0 | 22.1 |
| 11.0～ | 19.9 | 23.0 | 20.5 | 22.7 |
